## RESEARCH ARTICLE

## Green R &amp; D investment, ESG reporting, and corporate green innovation performance

Fawad Rauf<sup>1</sup>, Wang Wanqiu<sup>1</sup>, Khwaja Naveed<sup>2</sup>, Yanqiu Zhang<sup>3\*</sup>

**1** College of Economics and Management, Beijing University of Technology, Beijing, China, **2** Department of Accounting, College of Business and Economics, United Arab Emirates University, Al Ain, Abu Dhabi, **3** Management College, Beijing Union University, Beijing, China

\* [yanqiu.zhang@buu.edu.cn](mailto:yanqiu.zhang@buu.edu.cn)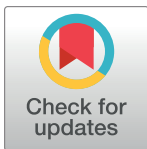

## Abstract

Given the contradictory empirical evidence on the relationship between green R&D expenditure and corporate Green Innovation performance (GIP), The present research study is a distinctive investigation into the moderating impacts of ESG reporting on this relationship. We utilized a data collection of 3,846, firm-year observations of A-share listed firms in China from 2016 to 2022 from CSMAR and Bloomberg databases. The firm's Corporate GIP is assessed and measured by looking at the total quantity of green patents. Lastly, models with multiple regression analyses and fixed effects were employed. The findings show that ESG reporting has a positive and significant impact on the association between corporate GIP and green R&D expenditure, implying its compensating and supportive function in the form of green signals in green outputs. This research could help executives and lawmakers, especially in developing countries to build innovative environmental strategies for business sustainability.

## OPEN ACCESS

**Citation:** Rauf F, Wanqiu W, Naveed K, Zhang Y (2024) Green R & D investment, ESG reporting, and corporate green innovation performance. PLoS ONE 19(3): e0299707. <https://doi.org/10.1371/journal.pone.0299707>

**Editor:** José Antonio Clemente Almendros, Universidad Internacional de La Rioja, SPAIN

**Received:** October 19, 2023

**Accepted:** February 13, 2024

**Published:** March 28, 2024

**Peer Review History:** PLOS recognizes the benefits of transparency in the peer review process; therefore, we enable the publication of all of the content of peer review and author responses alongside final, published articles. The editorial history of this article is available here: <https://doi.org/10.1371/journal.pone.0299707>

**Copyright:** © 2024 Rauf et al. This is an open access article distributed under the terms of the [Creative Commons Attribution License](https://creativecommons.org/licenses/by/4.0/), which permits unrestricted use, distribution, and reproduction in any medium, provided the original author and source are credited.

**Data Availability Statement:** In our submission, we have included the data as 'supporting information' to ensure that our study's findings are replicable and transparent. However, we acknowledge that the primary datasets utilized in

## 1. Introduction

Companies should look for current possibilities to improve their situation and market position in comparison to competitors in today's market rivalry [1]. Earnings and competitive advantage are earned through innovation [2, 3]. and a concomitant desire to achieve economic stability and environmental leadership [4, 5]. On either side, innovation is frequently risky and costly. As a result, the key question is whether advanced innovation that promotes financial efficiency can simultaneously reduce environmental damage. Greening, innovation, teamwork, openness, and social inclusion are the five main development ideas in China's new phase.

China's economic growth and development rests heavily on the individual performance of its companies [6]. However, despite being the world's second-largest economy, China's Environmental Performance Index (EPI) ranking of 120th out of 180 countries (Yale University, Columbia University, & World Economic Forum, 2018) indicates significant environmental challenges [7]. As the global trend towards sustainable business practices gains momentum, Chinese companies must embrace Corporate Green Innovation Performance (CGIP) to

our research are sourced from the CSMAR and Bloomberg databases, access to which is governed by subscription-based restrictions.

**Funding:** The Humanities and Social Science Project of the Ministry of Education: Research on the Driving Mechanism and Implementation Path of ESG Information Disclosure in Chinese Enterprises under the "Dual Carbon" Goal (22YJAG30115).

**Competing interests:** he authors have declared that no competing interests exist.

improve their financial and environmental performance simultaneously [8, 9]. This involves integrating environmental responsibility into innovative activities to minimize negative environmental impacts. Notably, the "One Belt, One Road" initiative, while promoting economic progress, has also led to increased energy consumption and carbon emissions in many participating countries [10]. Therefore, green investment within this initiative becomes crucial to achieve a win-win scenario for society, the environment, and national finances.

While a narrower information gap between corporations and shareholders might initially appear detrimental, studies have shown it can lead to positive outcomes. The decreased information gap between corporations and their shareholders has resulted in a decrease in the value of firm assets and growth in the firm's value [11, 12]. This implies that increased transparency allows companies to focus on long-term value creation for all stakeholders, rather than short-term gains through information manipulation [13, 14]. One key tool in fostering this transparency is environmental, social, and governance (ESG) reporting. In 2008, ESG certificates started to be issued under ISO 9000 and ISO 14001, whereby most large corporations have increasingly adopted compliance in their annual reports to openly publish their ESG activity [15, 16]. Murphy [17] suggest three plausible causes behind this trend: a desire to fulfill societal expectations of corporate responsibility, enhance legitimacy, and encourage investment in green R&D. Ultimately, active engagement with ESG principles and transparent reporting can benefit corporations in two ways. Firstly, it can create a positive public image, presenting the company as dignified and ethical. Secondly, it helps meet stakeholder expectations and build trust, leading to better long-term performance [18–22]. The well-known Berle's-Dodd debate has piqued the public's interest in CSR. Berle's [23] According to others, companies should only be examined if they raise the worth of their shareholders. Dodd's [24] viewpoint advocates the idea that corporations should be held responsible to investors and ordinary individuals. ESG typically includes obligations to employees, lenders, consumers, social welfare, the environment, and profit. In other words, ESG is the commitment to stakeholders rather than simply investors. By focusing on firms' responsibilities to shareholders, it has been discovered that ESG and firm performance are linked [25–29]. As a result, it is necessary to examine the effect of ESG reporting on green R&D investment as well as the moderation function of ESG reporting on corporate GIP.

While existing research points to a direct link between corporate green innovation performance (GIP) and green R&D, the nature of this relationship remains complex. Past studies have explored various outcomes, ranging from positive to negative to neutral, when examining the impact of green R&D on GIP [30]. This suggests that additional factors beyond the simple correlation may be at play, potentially influencing the observed connections. Li et al. [31], and Pham & Tran [32] highlight the possibility of such intervening variables, urging further investigation into their role in shaping the relationship between green R&D and GIP.

A growing emphasis has been placed on the valuable effects of ESG reporting on an enterprise's financial capability [33, 34]. Financial execution can be examined and evaluated throughout time by shareholders, management, and other investors using ESG ratings and reports [35–37]. There are three plausible reasons why ESG was chosen as the research variable in this study. First, ESG information can effectively illustrate a company's financial efforts in ESG [38, 39]. Secondly, ESG data is the most impartial way to evaluate the long-term performance of a firm, indicating valid differentiation in the model. Lastly, extant research on ESG reporting has reawakened attention. ESG reporting combines sustainability data, ESG, and sustainable [40, 41]. In developing countries, the association between ESG reporting and research is less widespread [42, 43]. Furthermore, the correlation between ESG and corporate GIP is still poorly understood. As a result, the goal of this research is to identify how ESG reporting influence the relationship between green R&D investment and corporate GIP, As

China's economic development places a larger emphasis on social and environmental issues, ESG practices are projected to become more popular. The findings of that probe will add to our understanding of green initiatives in developed economies.

Sustainability and social responsibility theories form the backbone for analyzing the links between corporate GIP, ESG reporting, and investments in green R&D [44, 45]. Sustainability theory advocates for businesses to factor in economic efficiency, social accountability, and environmental preservation during their operations [44, 46]. A company's performance serves as a yardstick to assess its effectiveness across these three realms. Strong corporate performance signals profitability, growth, and a greater inclination towards prioritizing social responsibility and environmental sustainability [47]. Moreover, a company's commitment to sustainability and social responsibility is underscored by its investment in green R&D, a practice closely aligned with the concept of social responsibility [44, 48].

This research will contribute to the corpus of existing information in the following ways: firstly, the vast majority of current ESG research focuses on the relationship between ESG reporting and financial success; however, the association between ESG reporting and corporate GIP has yet to be discovered. We're trying to fill a gap in the ESG literature. Secondly, this study adds to the current body of information by looking into the link between green R&D investment, ESG reporting data and corporation GIP. While socially responsible investing has a huge context in the Chinese scenario, it is less studied in the scenario of rising markets in industrialized countries. Our findings could lead to new approaches to increasing corporate GIP through R&D investment and ESG reporting.

Finally, for executives observing the development of ecological policies for innovation, this study expands on our understanding of the corporate GIP mechanisms that underlie the observed relationship between green R&D investment, ESG reporting, and corporate GIP. They proposed the overinvestment hypothesis in this setting using agency theory. It implies that the benefits of green R&D investments in enhanced family businesses stem from ESG reporting. To the utmost of our abilities, no previous published study has discovered that ESG reporting influences the connection that exists between green R&D investment and company GIP.

The following structure depicts the paper's structure. The framework for the literature and the creation of hypotheses are offered in Section 2. The technique, sample, details, empirical frameworks, and sample are all provided. in Section 3. Section 4 examines empirical results. The closing, implications, limitations, and future direction are presented in Section 5.

## 2. Development of a theoretical framework and hypotheses

To fill these gaps in research, a comprehensive model has been created using agency theory, resource-based view (RBV) theory, and legitimacy theory. Agency theory highlights the potential for conflict between shareholders and other stakeholders, creating an obstacle to effective ESG reporting. To manage this, Cormier et al. [49] suggest that companies often utilize different information reports to portray varying levels of firm performance to different stakeholder groups. This raises the question of how reliable ESG reporting is. Traditionally, research on ESG reporting focused on its role in enhancing a company's legitimacy rather than directly investigating its motivations. For example, Mayer & Ducaai [50] found that emphasizing tax benefits and minimizing information asymmetry are seen as key benefits of ESG reporting for enhancing a company's image of responsible conduct.

In terms of legitimacy theory, According to several experts, the perception of ESG reporting is primarily dependent on this hypothetical structure [51]. According to this theory, Firms act as objects when they accept achievements that are constrained by social norms, expectations,

and standards [52, 53]. Van Staden and Hooks [54] suggested that businesses adopt reactive or proactive tactics to get credibility. The reactive techniques refer to ESG information provided by businesses in response to unfavorable or major occurrences. For years, the company's strategy for delaying the rise in legality issues has been utilized to put legitimacy ideas to the test [55–57]. Birkey et al. [58], evaluated whether or not there is a significant relationship between the corporate sector and the importance of ESG reporting [59]. Other researchers contended that when compared to enterprises in ecologically sensitive industries, Companies in environmentally sensitive areas publish more ESG reporting data, which also demonstrates the study's effectiveness [60]. Hoffman [61] was concerned that businesses in similar regions and states would isolate the many parties involved in their methods, providing a receptive environment in which to evaluate one another to achieve public attention and validate performance [61]. Similarly, Gray et al. [62], recommended linking disclosure policies to business and government power, underlining the legality theory's persistence [62]. In addition, Castello and Lozano [63] anticipated that there would be a demand for the Dow Jones Sustainability Index (DJSI) as a moral legality model. As a result, participation in DJSI is critical because it makes people recognize that the organization's performance fulfills public expectations, which can be a strong indicator of its legitimacy [64]. According to Campbell [65], companies can use non-financial information to respect societal values and beliefs while also acting environmentally responsible, according to research suggestions [66].

The Resource-Based View (RBV) states, Resources and managerial abilities are critical in gaining a competitive advantage [67]. In addition, it asserts that firms can expand over time and gain a competitive advantage by addressing typical environment-related problems. Hart [68] remarked regarding the shortcomings of RBV theory that it does not consider any contact between the natural administrative environment and the association itself. This elimination was used to make sense. However, it is obvious that the environment plays an important role in developing a competitive advantage [68]. Natural resources as well as skills, according to Hart and Dowell [69], calculate the economics of pollution reduction. Environmental resources, avoidance of pollution strategies, and managerial qualities all contribute to long-term success [69]. By emphasizing the social, economic, and environmental components of ESG, Researchers can use RBV's natural theory to quantify the performance of companies [70]. This research complements its framework for ESG reporting (economic, social, and environmental assessment), corporate GIP, and company performance via the lens of natural RBV theory.

## 2.1. Green (R & D) investment and corporate GIP

When evaluating a company's Green Innovation Performance (GIP), it's crucial to highlight the pivotal role played by investment in green Research and Development (R&D) activities [30, 71, 72]. It's widely acknowledged as a critical factor in bolstering both economic advancement and the value of businesses [73]. Creating novel and inventive products while attaining expertise and proficiency in comprehending intricate processes [74], and acquiring innovation is crucial. Elevated levels of investment in green R&D can significantly facilitate the establishment and execution of Green Innovation Performance (GIP). Developing accessible technology can notably influence the company's growth in productivity [75, 76].

According to the Natural Resource-Based View (RBV) perspective, businesses should integrate environmental sustainability into their planning processes, thereby contributing to the development of innovative strategies [68]. Consequently, this framework emerges as a means to fortify the company's capacity to navigate uncertainty and cultivate invaluable managerial expertise [77]. This plays a pivotal role in the company's capability to conduct green



innovation performance (GIP) activities and expand its GIP resources [78]. Salter & Laursen (2006) highlighted the importance for businesses to possess environmental resources in order to foster innovation [79]. Triguero, Mondejar, Moreno, and Davia [80] recognize that having superior access to external data heightens the potential for growth in GIP [80, 81]. Elevated green investment in research and development can assist enterprises in acquiring these resources. The rapidly changing technological landscape of today not only encourages innovation but also surpasses the innovation pace seen in the past [82]. The company needs innovative strategies to swiftly adapt to unforeseen changes and to provide diverse solutions that address latent consumer needs [83, 84]. Augmented investment in green Research and Development (R&D) can assist the firm in acquiring reliable market data crucial for advancing technological developments [85], and focus on a broad spectrum of highly valuable and distinctive products, along with enhanced manufacturing advancements, to enhance their overall performance [86]. Companies investing in green research and development tend to face reduced risks of obsolescence [87]. They achieve this by enhancing their technological resources and expertise while remaining mindful of current advancements in technology [88], while also acknowledging emerging trends in this context [79].

Pollution avoidance empowers companies to cease polluting manufacturing processes, modify construction methods to reduce life cycle outcomes, and develop new products with reduced life cycle impacts [68]. Reducing business expenses is a potential outcome. A sustainable environment can also support the development of organizational skills within companies [89, 90]. Companies can benefit from reduced cost factors, load management, recycling initiatives, and maintenance strategies, among other aspects of product creation [91, 92]. To cut down on operational expenses, it's important to note that eliminating pollution could potentially elevate demand for a company's products among environmentally conscious consumers. Globally, environmentally conscious businesses are increasingly preferred due to their sustainable practices, cost reductions, and increased endorsements [93]. Stronger support can incentivize environmentally conscious enterprises to leverage their management practices as selling points, distinguishing themselves from competitors. Consequently, green organizations are demonstrating a growing array of technological breakthroughs in the market [94]. It's considered among the most assertive approaches to leverage environmental progress for aiding firms in enhancing their management capabilities. This allows them to employ more adaptable strategies across various scenarios and address societal concerns effectively [95]. We believe that Corporate (GIP can aid firms in enhancing their products and internal processes while reducing operational costs. Additionally, it can lower overall risk by differentiating them from competitors and bolstering their external reputation and trustworthiness [77].

Certain companies have pioneered novel methodologies, resulting in increased investment in green R&D. As the company's commitment to green R&D expands, leaders can achieve more efficient GIP by leveraging resources, capabilities, and ingenuity. This involves empowering employees, refining processes, and adopting cutting-edge technologies. They would be satisfied with an elevated GIP both internally and externally, achieving more with fewer resources and yielding a superior overall return on investment [96]. As a result, boosting green R&D investment provides a long-term and operational benefit for GIP.

**Hypothesis (H1):** Green R&D investment correlates positively with corporate GIP.

## 2.2. Corporate GIP and ESG reporting

GIP is multifaceted and cannot be encapsulated by a singular term [97]. This is often regarded as the intersection of technological advancement and environmental effectiveness [98]. The

advancements highlighted in this study can serve as a catalyst for progress, contributing to energy efficiency, pollution prevention, emission reduction, and overall environmental preservation. These breakthroughs in green technology support the ecological stability of natural resources. The visibility of green initiatives by firms could be influenced by Corporate GIP, impacting the number of observable implementations by these companies. Hence, in this analysis, recent claims related to green initiatives are used as a proxy variable for corporate GIP, supported by research [99, 100]. Acquiring green patents involves securing intellectual property rights for environmentally friendly innovations, technologies, or processes that contribute to sustainability and ecological preservation.

GIP significantly contributes to the economic development of manufacturing-driven nations. However, the predominant focus has traditionally centered on innovation, placing Chinese firms primarily in the innovation stage rather than prioritizing green growth [101]. Uniting financial progress with green development can create new avenues for a resilient economy. Technological advancements have become a critical factor enabling green growth. However, continuously driving technological advancements to facilitate green development can be quite costly [102, 103]. The dynamic cultivation of corporate green innovation performance (GIP) and the acceleration of green transformation hinge on whether the evolution towards green initiatives can generate environmental advantages for firms while balancing increased economic benefits and heightened corporate significance.

ESG reporting holds significant weight in non-financial information disclosure. In China, organizations have initiated the publication of their ESG reports, unveiling corporate performance metrics and outlining commitments towards ESG principles [104]. Through excellent oversight of ESG implementation by all stakeholders, ESG is ascribed to achieving maximum social prosperity and sustainability [105]. Diminished environmental impacts and heightened ESG reporting practices are widely acknowledged and embraced across multiple countries [106]. In January 2008, the State Council's Resources Management Committee and the State-owned Assets Supervision and Administration Commission (SASAC) released guidelines for social responsibility information reports by parent companies, spurring enthusiasm among governing companies to issue ESG reports. Notably, statistics from SASAC indicate active ESG report publication by major corporations. In 2014 and 2015, approximately 57.55% and 75.89% of central enterprises, respectively, tended to release ESG reports [107]. Between 1998 and 2015, China's overall societal investment in Research and Development (R&D) within the GDP surged from 0.69% to 2.1%. The total social investment in 2015 reached 1430 billion RMB, with green R&D investment constituting over 77% of GDP and audit accounting for 2.10% of GDP. Regarding distribution, R&D investments in Chinese companies, state-owned research facilities, and universities in 2015 were 76.8%, 15.1%, and 7%, respectively. The following hypothesis is therefore put forward:

**Hypothesis (H2):** *There is a significant association between corporate GIP and ESG reporting.*

### 2.3. Moderating role of ESG reporting on corporate GIP—Green R&D investment

Green research and development (R&D) investment plays a crucial role in a company's success. It not only fosters the development of technical advancements but also enhances the company's capacity to create and disseminate innovations, especially in today's dynamic and constantly evolving environment [108]. Green R&D investment leverages both tangible and intangible assets, such as technological resources, financial investments, and skilled R&D personnel. In this context, the Resource-Based View (RBV) can aid in understanding how to

effectively utilize abundant and distinctive resources to enhance operational capabilities and introduce innovative products. This approach enables the company to cultivate sustained moderate profits while maintaining strong performance.

Excessive investment in green research and development (R&D) within a company, primarily due to inherent problems and budgetary constraints, may not necessarily bolster internal productivity. Instead, it could result in neglecting Environmental, Social, and Governance (ESG) performance. This might occur due to the insecurity of internal resources caused by inefficient R&D investment practices. Additionally, an overemphasis on R&D could lead to employee dissatisfaction, particularly stemming from a lack of consideration for environmental concerns and ESG norms [109, 110]. ESG efforts have often been viewed as costly endeavors for businesses. Consequently, corporations may perceive ESG operations as supplementary and expensive measures that negatively impact the manufacturing industry [111].

Innovative green businesses are showcasing a growing array of technological advancements within the market [94]. Leveraging environmental progress as a proactive strategy can significantly aid businesses in fortifying their management capabilities, enabling them to employ more adaptable approaches across diverse scenarios and address societal concerns effectively [95]. We believe that organizations dealing in corporate GIP can improve their goods and internal processes while lowering their operational costs. They can also reduce overall revenue by differentiating themselves from other members and improving their external reputation and reliability [77].

Porter [112] suggested that robust and fitting environmental practices would drive businesses to embrace Corporate GIP in energy conservation and environmental protection. Consequently, several scholars have concluded that environmental regulations can foster the advancement of corporate GIP [113–115]. It's suggested that mandatory ESG reporting serves as an environmental regulatory strategy, aiming to constrain pollution releases and spur Corporate Green Innovation Performance (GIP). The idea is that once companies disclose their ESG activities, government bodies and advocacy groups can leverage technology to pressure polluting firms into reducing their emissions by publicly highlighting their environmental impact [116, 117].

In general, mandatory ESG reporting impacts company GIP in two primary ways. Firstly, ESG reporting data can mitigate agency problems, aiding managers, and shareholders in maintaining control over ownership. In instances where information inconsistency worsens the agency problem, mandatory ESG reporting, as a non-financial reporting technique, might reduce information inconsistencies and improve monitoring [118]. A professional business model states that directors can reduce the risk of innovation, and increasing supervision can increase incentives to innovate [119]. Secondly, ESG reporting information, as an environmental guideline, can encourage corporations' GIP (see Fig 1). Hence, the following hypothesis is proposed:

**Hypothesis (H3):** *ESG reporting positively moderates the association between green R&D investment, and corporate GIP.*

### 3. Data collection, quantification, and study methodology

#### 3.1. Sample and data

That's an extensive dataset covering Chinese corporations listed on the Shanghai and Shenzhen stock exchanges from 2016 to 2022, with a focus on non-financial companies. The data was sourced primarily from the Chinese Stock Exchange and the Accounting Research (CSMAR) as well as the Bloomberg Database, which are reputable sources for information on

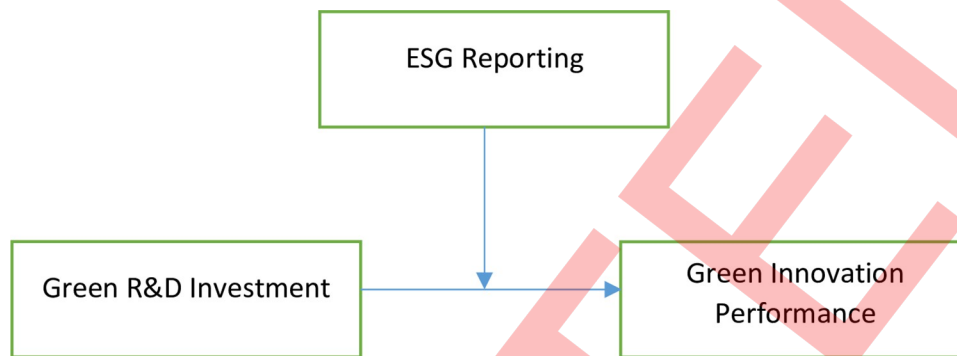

**Fig 1. Green R & D investment, ESG reporting, and corporate GIP.**

<https://doi.org/10.1371/journal.pone.0299707.g001>

Chinese-listed enterprises. The manual acquisition of ESG scores indicates a hands-on approach to assessing environmental, social, and governance aspects. Emphasizing industrial sectors aligns well with the typical involvement of firms in green Research and Development (R&D) initiatives. With 3,846 firm-year observations obtained after eliminating missing data points, your dataset seems robust and comprehensive for analysis purposes.

### 3.2. Corporate Green Innovation Performance (GIP)

In this study, corporate green innovation performance (GIP) is employed as a dependent variable, with two components: intention and performance. The China National Holding Administration (CNIPA) has mixed 10137 application patents from 327 energy-intensive listed companies, such as patents, effectiveness models, etc. In addition, 2971 green patents have been erased in this research to get the keywords: 1. greenish 2. Sustainable 3. Low greenhouse gas emissions 4. Environmental 5. Clean 6. Saving energy 7. Protecting 8. Ecology 9. Waste disposal 10. Environmental protection, and 11. Emissions reduction from the 10137 evaluation patents. A tendency towards Green Innovation can be a two-variable that equals 1 if a firm acquires a minimum of one green evaluation patent and nil otherwise. In this investigation, GIP is represented by the number of green patents [120, 121].

### 3.3. Green Research and Development (R&D) investment

We adapted the items proposed by Lee and Min [122] and Cui and Wang [123] for green, Green Research and Development (R&D) investment, which reflects the organizations' expenditure on equipment, employees, and funds. There are three factors, which are "Green R&D equipment investment makes up a sizable share of total equipment asset investment", "Employees involved in green R&D make up a sizable share of the entire workforce," and "green capital investment R&D makes for a sizable share of total capital investment" [122, 123].

### 3.4. Moderating role of Environmental Social & Governance (ESG) reporting

We employed ESG reporting as a mediating dependent variable. To measure ESG reporting, we utilize the Social Responsibility Score provided by the Chinese ESG score company <https://www.bloomberg.com/>. The score is an in-depth analysis of the ESG facets of businesses with listings on the Shanghai and Shenzhen Stock Exchanges. We used an amphibious technique to create the ESG index: Recent ESG disclosure data collection has extensively employed



Bloomberg's ESG reporting [124, 125]. ESG information was evaluated utilizing the Bloomberg-published ESG reporting score of Chinese listed companies. Better ESG disclosure is indicated by a higher score. The developing method was used to evaluate the score for ESG reporting: ESG Score,  $\sum_{j=1}^{11} \times 100$ , where  $i$  equals 1 if the item is described and 0 otherwise and where  $n$  represents the number of items.

**3.2.6. Control variables.** We were able to manage the issues that could have an impact on the ESG reporting in this investigation, as depicted: [126]. (1). Return on assets (ROA), is the percentage of net earnings after tax to total assets [127]; (2). firm age (FA), which was determined by the number of years from firm establishment to the inference [128]; (3). Financial Leverage (FLever) is considered a possible predictor of FP that can resolve the agency problem in a public entity. In previous studies, we calculated financial leverage using the debt-to-equity ratio [129]; (4). State-owned enterprises (SOEs) were regulated by the state or the government, and a particular factor equal to 1 was used to evaluate it [130]; (5). Tobin Q It is a variable concerning the percentage between the market value and the added value of a physical asset. (6). Chief executive officer Duality (CEOD) If the CEO also serves as the chair of the company's board of directors, it may help to develop dependable and irrefutable governance, supporting the CEO's consolidation of power [131]. CEO duality is a binary variable, with 1 representing 'duality' and 0 representing 'non-duality'. (7). Firm size (FS) Firm size is taken as an indicator of FP and credibility. We measure firm size using net income (Asset) and employee number, as earlier studies had also done [132]; (8). Ownership concentration (OC) has been calculated using the total stockholding of a first key creditor [133]; (9). Investment opportunities (IO) market value of a firm multiplied by the replacement value of its assets [134]; (10). Growth opportunity (GO) is defined as the rate of increase in the company's primary income [135]; Finally, (11). A year and Industry dummy (YI) we incorporated, we retain the year impact because of some possible threats, which are not obtained in our concepts or may occur and impact a company's business performance industry dummies to control the particular consequence of the company [136]; All of these control variables are often used in research on Chinese firms. See Table 1.

**3.2.7. Empirical model.** We build ordinary list square (OLS) regression models to test our hypothesis and then use fixed effect tests to investigate further.

Model 1 is used to investigate the association between green R&D investing and corporate GIP.

$$GIP_{(i,t)} = a + \beta_1 R \& D + \sum_{i=1}^N \beta_n \text{controls}_{(i,t)} + \epsilon_{(i,t)} \quad (1)$$

Model (2) is used to investigate the influence of ESG Reporting on Corporate GIP:

$$GIP_{(i,t)} = a + \beta_2 ESG + \sum_{i=1}^N \beta_n \text{controls}_{(i,t)} + \epsilon_{(i,t)} \quad (2)$$

Model (3) is used to investigate how ESG reporting affects the link between green R&D investment and corporate GIP.

$$GIP_{(i,t)} = a + \beta_3 R \& D + \beta_4 ESG + \beta_5 R \& D \times ESG + \sum_{i=1}^N \beta_n \text{controls}_{(i,t)} + \epsilon_{(i,t)} \quad (3)$$

where  $i$  and  $t$  denote the firm and the year, respectively;  $b$  denotes the assumed parameter, and  $\epsilon$  denotes the error component.

Table 1. Description of variables.

| Variables                           | Abbreviation | Measurement                                                                                                                                                               |
|-------------------------------------|--------------|---------------------------------------------------------------------------------------------------------------------------------------------------------------------------|
| Green Innovation Performance        | GIP          | The count of patent applications for green inventions.                                                                                                                    |
| Green Research & Development        | R&D          | The aggregate value of Research and Development (R&D) is computed by combining both Green R&D and generic R&D expenditures                                                |
| Environmental Social and Governance | ESG          | ESG information serves as a proxy for ESG and is quantified as a score ranging from 1 to 100. This score is assigned by a Rankins agency to a specific business each year |
| State Owned Enterprise              | SOEs         | equivalents for a dummy variable 1 if the local or regional government is the dominant owner, and 0 otherwise.                                                            |
| Tobin Q                             | Tobin Q      | market value of a firm's outstanding shares to the replacement cost of its tangible assets.                                                                               |
| Firm Age                            | FA           | The duration of the firm's existence was used to establish its age.                                                                                                       |
| Return of Assets                    | ROA          | It is a factor affecting the proportion of total profits to total assets.                                                                                                 |
| Financial Leverage                  | FLever       | To determine the asset-liability ratio, divide (total liabilities) by (the total number of assets) (total resources as an average).                                       |
| CEO Duality                         | CEOD         | when an individual holds the positions of Chairman and CEO simultaneously, it is referred to as CEO duality.                                                              |
| Firm Size                           | FS           | The total assets at the end of the fiscal year represent the aggregate value of all assets held by a company                                                              |
| Ownership Concentration             | OC           | Distribution of ownership stakes among shareholders in a company.                                                                                                         |
| Investment Opportunities            | IO           | Assets that offer the potential for financial gain or return on investment                                                                                                |
| Growth opportunity                  | GO           | characterized as the pace of expansion in a company's main source of income.                                                                                              |
| Year and Industry                   | YI           | In all regression analyses, Industry dummies are incorporated to manage the influences of both time (year) and specific firm characteristics.                             |

<https://doi.org/10.1371/journal.pone.0299707.t001>

## 4. Result and discussion

### 4.1. Descriptive statistic

Table 2 displays the descriptive statistics for the important variables. The average value of GIP is 0.053. Green R&D investment and ESG reporting have mean values of 9.475, and 3.434, respectively. Furthermore, public visibility and firm transparency are significantly and positively correlated with the effectiveness of GIP, which can give us a deep understanding of our critical theoretical stance. Hence, it is evident that public visibility and firm transparency can act as moderators and companies in the context of ESG reporting and GIP, green R & D investment. The association between all explanatory factors, including control variables, is shown in Table 2.

Table 2. Descriptive statistics.

| Variables | Mean   | SD    | Min     | Max    |
|-----------|--------|-------|---------|--------|
| GIP       | 0.053  | 0.063 | 0.000   | 1.000  |
| R&D       | 9.475  | 2.271 | 4.001   | 21.00  |
| ESG       | 3.434  | 0.846 | 1.000   | 8.000  |
| SOEs      | 0.266  | 0.471 | 0.000   | 1.000  |
| Tobin Q   | 1.784  | 1.828 | 0.095   | 32.261 |
| FA        | 10.246 | 0.836 | -18.543 | 42.635 |
| ROA       | 10.237 | 4.781 | 1.000   | 56.000 |
| FLever    | 0.516  | 0.226 | 0.006   | 1.345  |
| CEOD      | 0.164  | 0.383 | 0.000   | 1.000  |
| FS        | 0.286  | 0.483 | 0.000   | 1.000  |
| OC        | 1.177  | 1.163 | 0.032   | 10.381 |
| IO        | 0.158  | 0.372 | -0.817  | 10.862 |
| GO        | 2.443  | 1.951 | 0.746   | 33.684 |

<https://doi.org/10.1371/journal.pone.0299707.t002>

## 4.2. Correlation matrix

Table 3 displays the correlation coefficients of the major variable's results. The results reveal that GIP and green R&D are consistent at a 1% level, whereas ESG reporting is consistent at a 5% level. As a result, green Innovation and green R&D investment have a positive and strong relationship with mitigating ESG reporting, this also shows consistency at the 1% level among univariate affecting variables. All correlation analyses are less than 0.70, implying that the highest correlation between all variables does not rise by 0.641. As a result, no multicollinearity issue may have a significant impact on our results. The correlation coefficients of variance inflation factors (VIFs) were 0.653, suggesting that no variables were collinear.

## 4.3. OLS regression results

Table 4 presents the Ordinary Least Square (OLS) Regression results of Eqs (1) to (3). Before anything else in Model (1), the independent variable green R&D investment is significantly connected to the dependent variables in Model 1 revealing that green R&D investment had a strong connection to corporate GIP ( $\beta = 0.0042$ ,  $P < 0.000$ ). It supports Hypothesis (H1) and is consistent with the study of [135].

Secondly, In the second model, the ESG reporting variable is strongly connected to the dependent company GIP. (Table 3) demonstrates that ESG reporting has a favorable influence on GIP ( $\beta = 0.008$ ,  $P < 0.000$ ). Although corporate GIP is included, the company's ESG reporting remains good. According to the literature [120], We found that Green Innovation does, to some extent, govern the relationship between green R&D investment and ESG reporting, This backs up Hypothesis (H2). According to the findings, green R&D investment can boost company GIP through enhancing ESG reporting.

Lastly, Table 4 model (3) displays the OLS findings of the moderating influence of ESG reporting, corporate GIP, and green R&D investment. As a result, hypothesis (H3) suggests and verifies the link between green R&D spending and GIP with ESG reporting. Furthermore, Model 3 results show a positive and substantial relationship for green R&D x ESG reporting ( $\beta = 0.009$ ,  $p < 0.000$ ) that supports Hypothesis 3, which is consistent with the study of [30, 137].

Furthermore, in Table 4 Model (3), the regression findings of the moderating influence of ESG reporting on the link between GIP and numerous parameters of green R&D investment are presented.

Table 3. Correlations matrix.

| Variables | (1)       | (2)       | (3)       | (4)      | (5)      | (6)      | (7)      | (8)      | (9)      | (10)     | (11)     | (12)  | (13)  |
|-----------|-----------|-----------|-----------|----------|----------|----------|----------|----------|----------|----------|----------|-------|-------|
| GIP       | 1.000     |           |           |          |          |          |          |          |          |          |          |       |       |
| R&D       | -0.004    | 1.000     |           |          |          |          |          |          |          |          |          |       |       |
| ESG       | 0.631**   | -0.017*** | 1.000     |          |          |          |          |          |          |          |          |       |       |
| SOEs      | 0.042***  | -0.005*** | 0.021***  | 1.000    |          |          |          |          |          |          |          |       |       |
| Tobin Q   | -0.161**  | 0.331***  | -0.156*** | -0.062** | 1.000    |          |          |          |          |          |          |       |       |
| FA        | 0.007***  | -0.106*** | 0.047***  | 0.018**  | -0.098** | 1.000    |          |          |          |          |          |       |       |
| ROA       | 0.013***  | 0.561***  | 0.011***  | 0.023**  | 0.105**  | -0.014** | 1.000    |          |          |          |          |       |       |
| FLever    | 0.116***  | -0.418**  | 0.147***  | 0.031**  | -0.506** | 0.223**  | -0.102** | 1.000    |          |          |          |       |       |
| CEOD      | -0.134*** | 0.091**   | -0.082**  | -0.016*  | 0.132**  | -0.001** | 0.034**  | -0.124** | 1.000    |          |          |       |       |
| FS        | 0.047**   | -0.007**  | 0.027**   | 0.491**  | -0.057** | 0.012**  | 0.017**  | 0.028*   | -0.012** | 1.000    |          |       |       |
| OC        | 0.097**   | -0.296**  | 0.158**   | 0.015**  | -0.512** | 0.166**  | -0.092*  | 0.616**  | -0.124** | 0.016**  | 1.000    |       |       |
| IO        | -0.028**  | 0.166**   | -0.018**  | -0.001*  | 0.113*   | 0.102*   | 0.101*   | -0.037** | 0.096**  | -0.004** | -0.056** | 1.000 |       |
| GO        | -0.152**  | 0.297*    | -0.146**  | -0.057** | 0.654*   | -0.062*  | 0.095*   | -0.416*  | 0.135*   | -0.053*  | -0.454   | 0.128 | 1.000 |

\*, \*\*, \*\*\*, significant at 10%, 5%, and 1%, respectively.

<https://doi.org/10.1371/journal.pone.0299707.t003>

Table 4. GIP and green R&amp;D investment effects on ESG reporting.

| Variables      | Model 1 GIP |         | Model 2 GIP |         | Model 3 GIP |         |
|----------------|-------------|---------|-------------|---------|-------------|---------|
|                | Coefficient | P-Value | Coefficient | p-Value | Coefficient | p-Value |
| GIP            | 0.0042 ***  | 0.000   | -----       | -----   | -0.001      | 0.002   |
| R&D            | -----       | -----   | 0.008***    | 0.000   | 0.015       | 0.000   |
| ESG            | -----       | -----   | -----       | -----   | 0.009***    | 0.000   |
| R&D x ESG      | -----       | -----   | -----       | -----   | -----       | -----   |
| SOEs           | -0.003      | 0.874   | 0.005       | 0.817   | 0.010       | 0.317   |
| Tobin Q        | 0.012***    | 0.000   | 0.012***    | 0.000   | 0.005***    | 0.001   |
| ROA            | 0.101***    | 0.000   | 0.101***    | 0.000   | 0.132***    | 0.000   |
| FA             | -0.000      | 0.520   | -0.000      | 0.590   | -0.000      | 0.013   |
| FLever         | -0.092***   | 0.000   | -0.089***   | 0.000   | -0.084***   | 0.000   |
| CEOD           | 0.000       | 0.821   | 0.000       | 0.957   | 0.0023      | 0.258   |
| FS             | 0.005       | 0.156   | 0.007       | 0.754   | -0.010      | 0.324   |
| OC             | 0.000       | 0.577   | 0.001       | 0.554   | 0.000       | 0.976   |
| IO             | 0.007***    | 0.003   | 0.007***    | 0.002   | 0.015***    | 0.000   |
| GO             | -0.006      | 0.030   | -0.006      | 0.028   | -0.001      | 0.246   |
| YI             | YES         | YES     | YES         | YES     | YES         | YES     |
| Constant       | 0.0318***   | 0.000   | 0.035***    | 0.000   | 0.050***    | 0.000   |
| R <sup>2</sup> | 0.4244      |         | 0.4272      |         | 0.4771      |         |

Note

\*, \*\*, \*\*\*, significant at 10%, 5%, and 1%, respectively.

<https://doi.org/10.1371/journal.pone.0299707.t004>

#### 4.4. Fixed effects tests results

We used a Fixed Effect test to confirm our main conclusion, which is that corporate GIP is highly connected with ESG reporting and that ESG reporting moderates this relationship [120]. Results suggest that the firm's GIP can improve the quality of ESG reporting [138]. The value of company green R&D investment was positive and substantial in Model 1, and this green R&D investment coefficient has a favorable influence on corporation GIP ( $\beta = 0.004$ ,  $p < 0.000$ ). In Model 2, ESG reporting moderates the corporate GIP association favorably. Model 2 exhibits a positive coefficient of ESG reporting, indicating that integrating ESG reporting as a moderating factor considerably boosts GIP ( $\beta = 0.005$ ,  $p < 0.000$ ). Overall, our fixed analysis reveals that ESG reporting moderates this association, which is consistent with our primary findings.

Our fixed effect testing is repeated. As far as we know, corporate GIP influences green R&D investment and ESG reporting. These data confirm the concurrent pattern Hypothesis. Table 4 shows that the influence on the interaction term ESG reporting investment is still highly favorable.

Table 5 shows the fixed effects results, which were used to examine the moderating influence and hence decrease potential multicollinearity. ESG reporting, according to hypothesis (3), moderates the combined effect of corporate GIP, green R&D investment, and green R&D x ESG reporting. Model 4 (Table 3) revealed that the interaction term R&D x ESG reporting was connected to corporate GIP in a favorable way ( $\beta = 0.008$ ,  $p < 0.005$ ), demonstrating that ESG reporting mitigates the negative impact of GIP on green R&D investment. Thus, (H3) was supported.

#### 4.5. Robustness test check

We used two different models to overcome the problem of robustness. A one-year lag model was used by the researcher to re-measure company GIP, green R&D investment, and ESG

Table 5. GIP and green R&amp;D investment impacts on ESG reporting (panel data analysis with fixed effects).

| Variables      | Model 1 GIP |         | Model 2 GIP |         | Model 3 GIP |         |
|----------------|-------------|---------|-------------|---------|-------------|---------|
|                | Coefficient | P-Value | Coefficient | p-Value | Coefficient | p-Value |
| GIP            | 0.004***    | 0.000   | -----       | -----   | -0.001***   | 0.002   |
| R&D            | -----       | -----   | 0.005***    | 0.001   | 0.021***    | 0.000   |
| ESG            | -----       | -----   | -----       | -----   | 0.008***    | 0.000   |
| R&D x ESG      | 0.007       | 0.460   | 0.008       | 0.418   | -0.005      | 0.819   |
| SOEs           | 0.005***    | 0.000   | 0.005***    | 0.000   | 0.013       | 0.000   |
| Tobin Q        | 0.133***    | 0.000   | 0.133***    | 0.000   | 0.098       | 0.000   |
| ROA            | -0.005      | 0.026   | -0.000      | 0.019   | -0.000      | 0.393   |
| FA             | -0.084***   | 0.000   | -0.084***   | 0.000   | -0.099      | 0.000   |
| FLever         | 0.029       | 0.156   | 0.002       | 0.239   | 0.000       | 0.921   |
| CEOD           | 0.007       | 0.156   | -0.008      | 0.424   | 0.007       | 0.753   |
| FS             | 0.000       | 0.569   | 0.000       | 0.719   | 0.001       | 0.464   |
| OC             | 0.015***    | 0.000   | 0.015***    | 0.000   | 0.007       | 0.002   |
| IO             | -0.001      | 0.025   | -0.001      | 0.222   | -0.006      | 0.019   |
| GO             | YES         | YES     | YES         | YES     | YES         | YES     |
| YI             | 0.056***    | 0.000   | 0.058***    | 0.000   | 0.014 ***   | 0.000   |
| Constant       |             |         |             |         |             |         |
| R <sup>2</sup> | 0.4720      |         | 0.4714      |         | 0.4198      |         |

Note

\*, \*\*, \*\*\*, significant at 10%, 5%, and 1%, respectively.

<https://doi.org/10.1371/journal.pone.0299707.t005>

reporting. Second, A one-year-lagged measure of corporate GIP, green R&D investment, and ESG reporting is used in a two-stage least squares (2SLS) regression (an instrumental variable approach) to solve the robustness problem. Table 6 shows the results of 2SLS regression for Models 1, 2, and 3. Therefore, it is possible to conclude that the results are reliable.

## 5. Discussions and conclusions

Previous research has acknowledged the potential disconnect between investment decisions and their impact on company performance. Our study delves deeper, investigating the role of internal firm mechanisms in bridging this gap, particularly focusing on Environmental, Social, and Governance (ESG) reporting as a moderator influencing the relationship between green Research and Development (R&D) and Corporate Green Innovation Performance (GIP).

ESG reporting has gradually established itself as a requirement for all corporate enterprises. The purpose of empirical research is to investigate the impact of ESG reporting on the link between green R&D and corporate GIP in China, a rapidly increasing industrialized nation. According to prior research, there is an increasing emphasis on the positive benefits of ESG reporting on an enterprise's financial capabilities [32, 137, 139]. The consequences were assumed to extend to non-financial outcomes.

Our empirical analysis provides strong support for all three proposed hypotheses:

- H1: Green R&D investment has a significantly positive association with Corporate Green Innovation Performance (GIP) (Model 1), confirming its critical role in driving sustainable innovation.
- H2: ESG reporting also exhibits a significant positive correlation with GIP (Model 2), highlighting the value of transparency and communication of green efforts in enhancing a company's image and performance.



Table 6. The influence of GIP, green R&amp;D investment, and the moderating function of ESG reporting (robustness test).

| Variables      | One-year lagged Measure |         |             |         |             |         | 2-SLS       |         |             |         |             |         |
|----------------|-------------------------|---------|-------------|---------|-------------|---------|-------------|---------|-------------|---------|-------------|---------|
|                | Model 1 GIP             |         | Model 2 GIP |         | Model 3 GIP |         | Model 1 GIP |         | Model 2 GIP |         | Model 3 GIP |         |
|                | Coefficient             | p-Value | Coefficient | p-Value | Coefficient | p-Value | Coefficient | p-Value | Coefficient | p-Value | Coefficient | p-Value |
| GIP            | 0.005***                | 0.000   |             |         | -0.002      | 0.002   | 0.002***    | 0.002   |             |         | -0.001***   | 0.003   |
| R&D            |                         |         |             |         |             |         |             |         |             |         |             |         |
| ESG            |                         |         | 0.008***    | 0.001   | 0.016       | 0.002   |             |         | 0.006***    | 0.004   |             | 0.001   |
| R&D x ESG      |                         |         |             |         | 0.009***    | 0.001   |             |         |             |         | 0.009***    | 0.002   |
| SOEs           | -0.004                  | 0.825   | 0.005       | 0.886   | 0.012       | 0.319   | 0.007       | 0.631   | 0.006       | 0.604   | -0.006      | 0.812   |
| Tobin Q        | 0.013***                | 0.001   | 0.012***    | 0.001   | 0.006***    | 0.002   | 0.007***    | 0.002   | 0.006***    | 0.001   | 0.012       | 0.001   |
| ROA            | 0.120***                | 0.004   | 0.102***    | 0.000   | 0.135***    | 0.001   | 0.119***    | 0.001   | 0.119***    | 0.001   | 0.096       | 0.001   |
| FA             | -0.001                  | 0.562   | -0.001      | 0.598   | -0.001      | 0.014   | -0.001      | 0.078   | -0.000      | 0.065   | -0.000      | 0.350   |
| FLever         | -0.080***               | 0.001   | -0.089***   | 0.001   | -0.085***   | 0.001   | -0.082***   | 0.001   | -0.082***   | 0.001   | -0.098***   | 0.001   |
| CEOD           | 0.000                   | 0.820   | 0.001       | 0.958   | 0.0024      | 0.257   | 0.001       | 0.224   | 0.002       | 0.343   | 0.001       | 0.931   |
| FS             | 0.006                   | 0.154   | 0.008       | 0.753   | -0.012      | 0.328   | 0.006       | 0.682   | -0.005      | 0.654   | 0.0072      | 0.713   |
| OC             | 0.000                   | 0.578   | 0.001       | 0.542   | 0.0001      | 0.948   | 0.001       | 0.701   | 0.000       | 0.609   | 0.001       | 0.467   |
| IO             | 0.008***                | 0.004   | 0.008***    | 0.003   | 0.016***    | 0.001   | 0.013***    | 0.002   | 0.012***    | 0.001   | 0.008       | 0.003   |
| GO             | -0.007                  | 0.032   | -0.007      | 0.029   | -0.001      | 0.245   | -0.002      | 0.142   | -0.002      | 0.147   | -0.008      | 0.019   |
| YI             | YES                     | YES     | YES         | YES     | YES         | YES     | YES         | YES     | YES         | YES     | YES         | YES     |
| Constant       | 0.0319***               | 0.000   | 0.037***    | 0.000   | 0.053***    | 0.000   | 0.058***    | 0.000   | 0.058***    | 0.000   | 0.054***    | 0.000   |
| R <sup>2</sup> | 0.4246                  |         | 0.4298      |         | 0.4778      |         | 0.4197      |         | 0.4197      |         | 0.4197      |         |

Note

\*\*\*, \*\*, \*, significant at 10%, 5%, and 1%, respectively.

<https://doi.org/10.1371/journal.pone.0299707.t006>

- H3: Most importantly, our results reveal a significant moderating effect of ESG reporting on the relationship between green R&D investment and GIP (Model 3). This means that increased ESG reporting strengthens the positive impact of green R&D on GIP, reinforcing the notion that transparent communication amplifies the effectiveness of green investments.

This finding contributes significantly to the ongoing discussion on the complex relationships between green R&D, GIP, and ESG reporting. It supports theoretical frameworks surrounding agency theory, stakeholder engagement, and resource-based approaches in the context of ESG and green innovation. Our work helps solidify the understanding of how transparent reporting acts as a crucial bridge between green investments and their tangible outcomes in improved GIP. Further investigation into the underlying mechanisms of this moderating effect is warranted.

Imagine a company investing heavily in green R&D, like developing eco-friendly technologies. The results, however, don't meet expectations. Why? Our research suggests it might be due to a missing piece: transparent communication. We found that ESG reporting, which openly reports environmental, social, and governance efforts, acts as a crucial bridge, amplifying the impact of green R&D on a company's green innovation performance (GIP). Increased volumes of ESG data build trust with stakeholders, attract resources, and foster collaboration, ultimately unlocking the full potential of green investments. It will enhance Legitimacy and trust with stakeholders, leading to greater support for green initiatives and R&D efforts. Transparent reporting may attract additional resources like funding or partnerships, further bolstering green R&D and innovation capabilities. Open communication of green efforts can foster collaboration with research institutions, environmental agencies, and other stakeholders, accelerating the translation of R&D into GIP.

Our findings paint a clear picture: companies seeking to maximize the impact of their green R&D should embrace ESG reporting as a vital tool. Executives can integrate these strategies, innovate manufacturing processes, and consider ESG indices in their decision-making. Governments can promote transparency through monitoring and green funding initiatives, ensuring the legitimacy and effectiveness of ESG reporting. By working together, businesses and governments can create a symphony of sustainable innovation, where green investments resonate with tangible environmental and financial improvements.

In conclusion, our research demonstrates the multifaceted relationship between green R&D, ESG reporting, and GIP. Increased green R&D investment and transparent communication through ESG reporting are essential for companies to achieve sustainable innovation and success. Importantly, our findings highlight the critical role of ESG reporting in amplifying the impact of green R&D, suggesting a synergistic approach to driving corporate green innovation performance.

### 5.1. Limitations and suggestions for future research

The limitations of this study might inform future research. First and foremost, our data support the existence of a positive relationship between corporate GIP and green R&D expenditure, we recognize that there is still a place for future study to build on our findings. e.g., Future work can analyze the structure or platform used to improve efficiency, especially through ESG reporting. Secondly, we simply used the quantity of green R&D investment input to quantify the variable of green R&D investment. Other types of R&D, including R&D personnel and intellectual capital, may influence ESG's capacity to access capital.

Green R&D expenditure should be measured, we just used the amount of green R&D investment input. Green R&D in other forms, such as R&D employees and intellectual capital, may influence ESG's capacity to access financial resources.

Thirdly, Companies interfere in community collaboration, particularly in ESG implementation, because of functional limits and the incapacity to undertake ESG assessments. Future research may further explore the relationship based on the specific content and quality of ESG reporting and its nuanced impact on GIP.

Lastly, we exclusively work with Chinese companies, as a result, the research findings may not apply to other nations. In China, ESG reporting is substantially lower. Furthermore, the firm's GIP setting is not very reasonable. This result varies greatly between developed and underdeveloped countries, this might limit the breadth of our research findings. Future studies should concentrate on organizations in a variety of more developed nations and compare their findings to those of the current investigation. However, the study's findings need to be studied further, both qualitatively and quantitatively.

## Supporting information

**S1 Data.**  
(XLSX)

## Author Contributions

**Conceptualization:** Wang Wanqiu.

**Data curation:** Fawad Rauf.

**Formal analysis:** Wang Wanqiu.

**Methodology:** Fawad Rauf.

**Resources:** Yanqiu Zhang.

**Software:** Khwaja Naveed.

**Writing – original draft:** Wang Wanqiu.

**Writing – review & editing:** Fawad Rauf, Khwaja Naveed.

## References

1. Aguilera-Caracuel J. and Guerrero-Villegas J., How corporate social responsibility helps MNEs to improve their reputation. The moderating effects of geographical diversification and operating in developing regions. *Corporate Social Responsibility Environmental Management*, 2018. 25(4): p. 355–372.
2. Hana U., Competitive advantage achievement through innovation and knowledge. *Journal of competitiveness*, 2013. 5(1): p. 82–96.
3. Rossi M., et al., Does a board characteristic moderate the relationship between CSR practices and financial performance? Evidence from European ESG firms. *Journal of Risk and Financial Management*, 2021. 14(8): p. 354.
4. Thyroff A.E. and Kilbourne W.E., Understanding pro-environmental intentions through growth, competitiveness, and concern. *Australasian Marketing Journal*, 2017. 25(2): p. 97–105.
5. Rokhmawati A., Gunardi A., and Rossi M., How powerful is your customers' reaction to carbon performance? Linking carbon and firm financial performance. *International Journal of Energy Economics and Policy*, 2017. 7(6): p. 85.
6. Zhang L., et al., Carbon emissions, energy consumption and economic growth: Evidence from the agricultural sector of China's main grain-producing areas. *Science of the Total Environment*, 2019. 665: p. 1017–1025. <https://doi.org/10.1016/j.scitotenv.2019.02.162> PMID: 30893733
7. Hao Y., et al., The spatial spillover effect and nonlinear relationship analysis between environmental decentralization, government corruption and air pollution: Evidence from China. *Science of The Total Environment*, 2021. 763: p. 144183. <https://doi.org/10.1016/j.scitotenv.2020.144183> PMID: 33383516

8. Ullah S., et al., Integrating external stakeholders for improvement in green innovation performance: role of green knowledge integration capability and regulatory pressure. *International Journal of Innovation Science*, 2023.
9. Makhoulfi L., et al., Impact of green entrepreneurship orientation on environmental performance: The natural resource-based view and environmental policy perspective. *Business Strategy and the Environment*, 2022. 31(1): p. 425–444.
10. Liu X.-Y., Chen Y.-N., and Li R. The development of China's service trade under the "One belt and one road" strategy. in 2019 4th International Conference on Social Sciences and Economic Development (ICSSSED 2019). 2019. Atlantis Press.
11. Mendes-Da-Silva W. and de Lira Alves L.A. The voluntary disclosure of financial information on the internet and the firm value effect in companies across Latin America. in *Universidad Navarra Barcelona*, 13th International Symposium on Ethics, Business and Society. 2004.
12. Rezaei F. and Ghanaeenejad M., A review on transparency in financial reporting and its effects on tax avoidance and firm value. *Journal of Commerce and Accounting Research*, 2014. 3(2).
13. Gray J.G., Managing the corporate image: The key to public trust. (No Title), 1986.
14. Yi R., et al., Does venture capital help to promote open innovation practice? Evidence from China. *European Journal of Innovation Management*, 2023. 26(1): p. 1–26.
15. Pan J.-N. and Chen M., A Comparative Study on an International Survey of ISO 9000 and ISO 14000 Certification. *Journal of Quality*, 2002. 9(2): p. 89–119.
16. Marimón F. and Llach J. ISO 9001 & ISO 14000 diffusion analysis according to activity sectors. in *V international conference on industrial engineering and industrial management*. 2011.
17. Murphy K.J., Executive compensation: Where we are, and how we got there, in *Handbook of the Economics of Finance*. 2013, Elsevier. p. 211–356.
18. Murphy D. and McGrath D., ESG reporting—class actions, deterrence, and avoidance. *Sustainability Accounting, Management and Policy Journal*, 2013. 4(2): p. 216–235.
19. Song M., Wang S., and Zhang H., Could environmental regulation and R&D tax incentives affect green product innovation? *Journal of Cleaner Production*, 2020. 258: p. 120849.
20. Fan J. and Teo T., Will China's R&D investment improve green innovation performance? An empirical study. *Environmental Science and Pollution Research*, 2022. 29(26): p. 39331–39344.
21. Zhang D., Does green finance really inhibit extreme hypocritical ESG risk? A greenwashing perspective exploration. *Energy Economics*, 2023. 121: p. 106688.
22. Tan Y. and Zhu Z., The effect of ESG rating events on corporate green innovation in China: The mediating role of financial constraints and managers' environmental awareness. *Technology in Society*, 2022. 68: p. 101906.
23. Berle A.A. Jr, Liability for Stock Market Manipulation. *Colum. L. Rev.*, 1931. 31: p. 264.
24. Dodd C.H., The framemork of the gospel narrative. *The expository times*, 1932. 43(9): p. 396–400.
25. Berle A., Corporate Powers as Powers in Trust, in «*Harvard Law Review*», 44. 1931.
26. Dodd E.J.H.L.R., Merrick E., "For Whom are Corporate Managers Trustees?". 1932. 45(8).
27. Deng X., J.-k. Kang, and B.S. Low, Corporate social responsibility and stakeholder value maximization: Evidence from mergers. *Journal of financial Economics*, 2013. 110(1): p. 87–109.
28. El Ghoul S., et al., Does corporate social responsibility affect the cost of capital? *Journal of Banking Finance*, 2011. 35(9): p. 2388–2406.
29. Becchetti L., et al., Going deeper into the S of ESG: a relational approach to the definition of social responsibility. *Sustainability*, 2022. 14(15): p. 9668.
30. Xu J., Liu F., and Shang Y., R&D investment, ESG performance and green innovation performance: evidence from China. *Kybernetes*, 2020.
31. Li Q., et al., Firm performance, corporate ownership, and corporate social responsibility disclosure in China. *Business Ethics: A European Review*, 2013. 22(2): p. 159–173.
32. Pham H.S.T. and Tran H.T., CSR disclosure and firm performance: The mediating role of corporate reputation and moderating role of CEO integrity. *Journal of Business Research*, 2020. 120: p. 127–136.
33. Raghavan K., ESG Reporting Impact on Accounting, Finance. *Journal of Global Awareness*, 2022. 3(1): p. 9.
34. Chouaibi S., Chouaibi J., and Rossi M., ESG and corporate financial performance: the mediating role of green innovation: UK common law versus Germany civil law. *EuroMed Journal of Business*, 2022. 17(1): p. 46–71.

35. Hamdi K., Guenich H., and Ben Saada M., Does corporate financial performance promote ESG: Evidence from US firms. *Cogent Business & Management*, 2022. 9(1): p. 2154053.
36. Chininga E., Alhassan A.L., and Zeka B., ESG ratings and corporate financial performance in South Africa. *Journal of Accounting in Emerging Economies*, 2023.
37. Chouaibi S., et al., Exploring the moderating role of social and ethical practices in the relationship between environmental disclosure and financial performance: Evidence from ESG companies. *Sustainability*, 2021. 14(1): p. 209.
38. Kang W. and Jung M., Effect of ESG activities and firm's financial characteristics. *Korean Journal of Financial Studies*, 2020. 49(5): p. 681–707.
39. Zhang X., Zhang J., and Feng Y., Can companies get more government subsidies through improving their ESG performance? Empirical evidence from China. *Plos one*, 2023. 18(10): p. e0292355. <https://doi.org/10.1371/journal.pone.0292355> PMID: 37788255
40. Krosinsky C., Kew J., and Krosinsky C., Dynamics emerge on ESG and sustainable investment in China. *Modern China: Financial cooperation for solving sustainability challenges*, 2020: p. 129–131.
41. Zheng J., Khurram M.U., and Chen L., Can green innovation affect ESG ratings and financial performance? evidence from Chinese GEM listed companies. *Sustainability*, 2022. 14(14): p. 8677.
42. Pucheta-Martínez M.C. and Gallego-Álvarez I., Do board characteristics drive firm performance? An international perspective. *Review of Managerial Science*, 2020. 14(6): p. 1251–1297.
43. Miras-Rodríguez M.d.M., F. Bravo-Urquiza B. Escobar-Pérez, Does corporate social responsibility reporting actually destroy firm reputation? *Corporate Social Responsibility and Environmental Management*, 2020. 27(4): p. 1947–1957.
44. Nguyen T.H., et al., Environmental performance, sustainability, governance and financial performance: Evidence from heavily polluting industries in China. *Business Strategy and the Environment*, 2021. 30(5): p. 2313–2331.
45. Ren X., Zeng G., and Zhao Y., Digital finance and corporate ESG performance: Empirical evidence from listed companies in China. *Pacific-Basin Finance Journal*, 2023. 79: p. 102019.
46. Sabokro M., Masud M.M., and Kayedian A., The effect of green human resources management on corporate social responsibility, green psychological climate and employees' green behavior. *Journal of Cleaner Production*, 2021. 313: p. 127963.
47. Sarfraz M., He B., and Shah S.G.M., Elucidating the effectiveness of cognitive CEO on corporate environmental performance: the mediating role of corporate innovation. *Environmental Science and Pollution Research*, 2020. 27: p. 45938–45948. <https://doi.org/10.1007/s11356-020-10496-7> PMID: 32808125
48. Oprean-Stan C., et al., Impact of sustainability reporting and inadequate management of ESG factors on corporate performance and sustainable growth. *Sustainability*, 2020. 12(20): p. 8536.
49. Cormier D., Magnan M., and Van Velthoven B., Environmental disclosure quality in large German companies: economic incentives, public pressures or institutional conditions? *European accounting review*, 2005. 14(1): p. 3–39.
50. Mayer R. and Reizingerné Ducsai A., ESG: Credibility behind the scores. The reliability and transparency of ESG ratings. *Prosperitas*, 2023. 10(2).
51. Cormier D. and Magnan M., The economic relevance of environmental disclosure and its impact on corporate legitimacy: An empirical investigation. *Business Strategy and the Environment*, 2015. 24(6): p. 431–450.
52. Patten D.M., Intra-industry environmental disclosures in response to the Alaskan oil spill: a note on legitimacy theory. *Accounting, organizations Society*, 1992. 17(5): p. 471–475.
53. Mobus J.L., Mandatory environmental disclosures in a legitimacy theory context. *Accounting, Auditing & Accountability Journal*, 2005.
54. van Staden C.J. and Hooks J., A comprehensive comparison of corporate environmental reporting and responsiveness. *The British accounting review*, 2007. 39(3): p. 197–210.
55. Carvosso R., The reactive model of disaster regulation in international law and its shortcomings. *Leiden Journal of International Law*, 2021. 34(4): p. 957–976.
56. Yi R., Liu S., and Lyu B., A bibliometric and visualization analysis of Artisan entrepreneurship. *Technology Analysis & Strategic Management*, 2023: p. 1–15.
57. Lyu B., et al., Stakeholder network for developing open innovation practice of China's manufacturing enterprises. *Heliyon*, 2023. 9(3).
58. Birkey R.N., et al. Does assurance on CSR reporting enhance environmental reputation? An examination in the US context. in *Accounting Forum*. 2016. Elsevier.



59. Eng L.L., Fikru M., and Vichitsarawong T., Comparing the informativeness of sustainability disclosures versus ESG disclosure ratings. *Sustainability Accounting, Management and Policy Journal*, 2022. 13 (2): p. 494–518.
60. Garcia A.S., Mendes-Da-Silva W., and Orsato R.J., Sensitive industries produce better ESG performance: Evidence from emerging markets. *Journal of cleaner production*, 2017. 150: p. 135–147.
61. Hoffman A.J., Institutional evolution and change: Environmentalism and the US chemical industry. *Academy of management journal*, 1999. 42(4): p. 351–371.
62. Gray R., Kouhy R., and Lavers S., Corporate social and environmental reporting: a review of the literature and a longitudinal study of UK disclosure. *Accounting, Auditing & Accountability Journal*, 1995. 8 (2): p. 47–77.
63. Castelló I. and Lozano J., From risk management to citizenship corporate social responsibility: analysis of strategic drivers of change. *Corporate Governance: The international journal of business in society*, 2009. 9(4): p. 373–385.
64. Castelló I. and Lozano J., From risk management to citizenship corporate social responsibility: analysis of strategic drivers of change. *Corporate Governance: The international journal of business in society*, 2009.
65. Campbell J.Y., Asset pricing at the millennium. *The Journal of Finance*, 2000. 55(4): p. 1515–1567.
66. Campbell D.J. Legitimacy theory or managerial reality construction? Corporate social disclosure in Marks and Spencer Plc corporate reports, 1969–1997. in *Accounting forum*. 2000. Taylor & Francis.
67. Barney J.B., Resource-based theories of competitive advantage: A ten-year retrospective on the resource-based view. *Journal of management*, 2001. 27(6): p. 643–650.
68. Hart S.L., A natural-resource-based view of the firm. *Academy of management review*, 1995. 20(4): p. 986–1014.
69. Hart S.L. and Dowell G., Invited editorial: A natural-resource-based view of the firm: Fifteen years after. *Journal of management*, 2011. 37(5): p. 1464–1479.
70. Bhandari K.R., Ranta M., and Salo J., The resource-based view, stakeholder capitalism, ESG, and sustainable competitive advantage: The firm's embeddedness into ecology, society, and governance. *Business Strategy and the Environment*, 2022. 31(4): p. 1525–1537.
71. Ketata I., Sofka W., and Grimpe C., The role of internal capabilities and firms' environment for sustainable innovation: evidence for Germany. *R & d Management*, 2015. 45(1): p. 60–75.
72. Xi S. and Lee C., A GAME THEORETIC APPROACH FOR THE OPTIMAL INVESTMENT DECISIONS OF GREEN INNOVATION IN A MANUFACTURER-RETAILER SUPPLY CHAIN. *International Journal of Industrial Engineering*, 2015. 22(1).
73. Ghisetti C. and Pontoni F., Investigating policy and R&D effects on environmental innovation: A meta-analysis. *Ecological Economics*, 2015. 118: p. 57–66.
74. Berchicci L., Towards an open R&D system: Internal R&D investment, external knowledge acquisition and innovative performance. *Research policy*, 2013. 42(1): p. 117–127.
75. Xu J., Wang X., and Liu F., Government subsidies, R&D investment and innovation performance: analysis from pharmaceutical sector in China. *Technology Analysis Strategic Management Journal*, 2021. 33(5): p. 535–553.
76. Wakelin K., Productivity growth and R&D expenditure in UK manufacturing firms. *Research policy*, 2001. 30(7): p. 1079–1090.
77. Wong C.Y., Wong C.W., and Boon-itt S., Effects of green supply chain integration and green innovation on environmental and cost performance. *International Journal of Production Research*, 2020. 58 (15): p. 4589–4609.
78. Kesidou E. and Demirel P., On the drivers of eco-innovations: Empirical evidence from the UK. *Research Policy*, 2012. 41(5): p. 862–870.
79. Laursen K. and Salter A., Open for innovation: the role of openness in explaining innovation performance among UK manufacturing firms. *Strategic management journal*, 2006. 27(2): p. 131–150.
80. Triguero A., Moreno-Mondéjar L., and Davia M.A., Drivers of different types of eco-innovation in European SMEs. *Ecological economics*, 2013. 92: p. 25–33.
81. Bigliardi B. and Bertolini M., Green innovation management: theory and practice. *European Journal of Innovation Management*, 2012.
82. Berry H., Global integration and innovation: multicountry knowledge generation within MNCs. *Strategic management journal*, 2014. 35(6): p. 869–890.
83. DeSarbo W., et al., Extending the Miles and Snow strategic framework: Strategic types, capabilities, environmental uncertainty, and firm performance. *Strategic Management Journal*, 2005. 26(1): p. 47–74.

84. Melander L., Customer and supplier collaboration in green product innovation: External and internal capabilities. *Business Strategy the Environment*, 2018. 27(6): p. 677–693.
85. Danneels E., The process of technological competence leveraging. *Strategic management journal*, 2007. 28(5): p. 511–533.
86. Kotabe M., Srinivasan S.S., and Aulakh P.S., Multinationality and firm performance: The moderating role of R&D and marketing capabilities. *Journal of international business studies*, 2002. 33(1): p. 79–97.
87. Chesbrough H.W. and Garman A.R., How open innovation can help you cope in lean times. *Harvard business review*, 2009. 87(12): p. 68–76. PMID: 19968058
88. Schoenmakers W. and Duysters G., Learning in strategic technology alliances. *Technology analysis strategic Management Journal*, 2006. 18(2): p. 245–264.
89. Nakamura E., Does environmental investment really contribute to firm performance? An empirical analysis using Japanese firms. *Eurasian Business Review*, 2011. 1(2): p. 91–111.
90. Alaarj S. and Mohamed Z., Do knowledge management capabilities reduce the negative effect of environment uncertainties on organizational performance? A study of public listed companies in Malaysia. *International Journal of Economic Research*, 2017.
91. Christmann P., Multinational companies and the natural environment: Determinants of global environmental policy. *Academy of Management Journal*, 2004. 47(5): p. 747–760.
92. Darnall N., Why firms mandate ISO 14001 certification. *Business & Society*, 2006. 45(3): p. 354–381.
93. Bansal P., Evolving sustainably: A longitudinal study of corporate sustainable development. *Strategic management journal*, 2005. 26(3): p. 197–218.
94. Aragón-Correa J.A., Strategic proactivity and firm approach to the natural environment. *Academy of management Journal*, 1998. 41(5): p. 556–567.
95. Rueda-Manzanares A., Aragón-Correa J.A., and Sharma S., The influence of stakeholders on the environmental strategy of service firms: The moderating effects of complexity, uncertainty and munificence. *British Journal of management*, 2008. 19(2): p. 185–203.
96. Alam M.S., et al., Does corporate R&D investment affect firm environmental performance? Evidence from G-6 countries. *Energy Economics*, 2019. 78: p. 401–411.
97. Lobo M.A.T., et al., Green Innovation at the Industrial level: A systematic review. *International Journal of Management Science and Operations Research*, 2019. 4(1): p. 13–19.
98. Brännlund R. and Karimu A., Convergence in global environmental performance: assessing heterogeneity. *Environmental Economics and Policy Studies*, 2018. 20(3): p. 503–526.
99. Song X., Zhou Y., and Jia W., How do economic openness and R&D investment affect green economic growth?—evidence from China. *Resources, Conservation and Recycling*, 2019. 146: p. 405–415.
100. Zhang J., et al., Cost-benefit analysis of China's action plan for air pollution prevention and control. *Frontiers of Engineering Management*, 2019. 6(4): p. 524–537.
101. Sun H., et al., Institutional quality, green innovation and energy efficiency. *Energy policy*, 2019. 135: p. 111002.
102. Fang Z., Bai H., and Bilan Y., Evaluation research of green innovation efficiency in China's heavy polluting industries. *Sustainability*, 2020. 12(1): p. 146.
103. Zhou X., et al., Spatial-temporal heterogeneity of green innovation in China. *Journal of Cleaner Production*, 2021. 282: p. 124464.
104. Weber O., Environmental, social and governance reporting in China. *Business Strategy and the Environment*, 2014. 23(5): p. 303–317.
105. Sadiq M., et al., The role of environmental social and governance in achieving sustainable development goals: evidence from ASEAN countries. *Economic research-Ekonomska istraživanja*, 2023. 36(1): p. 170–190.
106. Singhania M. and Saini N., Quantification of ESG regulations: a cross-country benchmarking analysis. *Vision*, 2022. 26(2): p. 163–171.
107. Hu J., Zou Q., and Yin Q., Research on the effect of ESG performance on stock price synchronicity: Empirical evidence from China's capital markets. *Finance Research Letters*, 2023: p. 103847.
108. Ganda F., Green research and development (R&D) investment and its impact on the market value of firms: evidence from South African mining firms. *Journal of Environmental Planning and Management*, 2018. 61(3): p. 515–534.
109. Dey P.K., et al., Environmental management and corporate social responsibility practices of small and medium-sized enterprises. *Journal of cleaner production*, 2018. 195: p. 687–702.

110. Li Z., Zou F., and Mo B., Does mandatory CSR disclosure affect enterprise total factor productivity? *Economic research-Ekonomska istraživanja*, 2022. 35(1): p. 4902–4921.
111. Williamson D., Lynch-Wood G., and Ramsay J., Drivers of environmental behaviour in manufacturing SMEs and the implications for CSR. *Journal of business ethics*, 2006. 67(3): p. 317–330.
112. Porter M.E., Towards a dynamic theory of strategy. *Strategic management journal*, 1991. 12(S2): p. 95–117.
113. Brunnermeier S.B. and Cohen M.A., Determinants of environmental innovation in US manufacturing industries. *Journal of environmental economics management Decision*, 2003. 45(2): p. 278–293.
114. Rehfeld K.-M., Rennings K., and Ziegler A., Integrated product policy and environmental product innovations: An empirical analysis. *Ecological economics*, 2007. 61(1): p. 91–100.
115. Porter M.E., America's Green Strategy *Scientific American*, 1991. 264(4).
116. Thaler R. and Sunstein C., *Nudge: Improving Decisions About Health, Wealth and Happiness* Yale University Press: New Haven & London. 2008.
117. Ivanova M.R., *Influencing corporations through shareholder activism: the case of three NGO-led campaigns in the UK*. 2015, Cardiff University.
118. Tsagas G. and Villiers C., Why “less is more” in non-financial reporting initiatives: Concrete steps towards supporting sustainability. *Accounting, Economics, and Law: A Convivium*, 2020. 10(2): p. <https://doi.org/10.1007/s12011-010-8628-y>
119. Aghion P., Van Reenen J., and Zingales L., Innovation and institutional ownership. *American economic review*, 2013. 103(1): p. 277–304.
120. Hong M., Drakeford B., and Zhang K., The impact of mandatory CSR disclosure on green innovation: evidence from China. *Green Finance*, 2020. 2(3): p. 302–322.
121. Li D., et al., Environmental legitimacy, green innovation, and corporate carbon disclosure: Evidence from CDP China 100. *Journal of Business Ethics*, 2018. 150(4): p. 1089–1104.
122. Lee K.-H. and Min B., Green R&D for eco-innovation and its impact on carbon emissions and firm performance. *Journal of Cleaner Production*, 2015. 108: p. 534–542.
123. Cui R. and Wang J., Shaping sustainable development: External environmental pressure, exploratory green learning, and radical green innovation. *Corporate Social Responsibility and Environmental Management*, 2022. 29(3): p. 481–495.
124. Yuan X., et al., ESG disclosure and corporate financial irregularities—Evidence from Chinese listed firms. *Journal of Cleaner Production*, 2022. 332: p. 129992.
125. Zahid R.A., Saleem A., and Maqsood U.S., ESG performance, capital financing decisions, and audit quality: empirical evidence from Chinese state-owned enterprises. *Environmental Science and Pollution Research*, 2023. 30(15): p. 44086–44099. <https://doi.org/10.1007/s11356-023-25345-6> PMID: 36681761
126. Hu W., Du J., and Zhang W., Corporate social responsibility information disclosure and innovation sustainability: Evidence from China. *Sustainability*, 2020. 12(1): p. 409.
127. Rauf F., et al., R&D investment, corporate social responsibility disclosure and firm's green innovation performance: evidence from China. *International Journal of Trade and Global Markets*, 2023. 18(1): p. 82–109.
128. Sun W., Zhao C., and Cho C.H., Institutional transitions and the role of financial performance in CSR reporting. *Corporate Social Responsibility Environmental Management*, 2019. 26(2): p. 367–376.
129. Rauf F., et al., Moderating Effect of Political Embeddedness on the Relationship between Resources Base and Quality of CSR Disclosure in China. *Sustainability*, 2020. 12(8): p. 3323.
130. Xu S., et al., Disclosure for whom? Government involvement, CSR disclosure and firm value. *Emerging Markets Review*, 2020. 44: p. 100717.
131. Fan D.K., Lau C.-M., and Young M., Is China's corporate governance beginning to come of age? The case of CEO turnover. *Pacific-Basin Finance Journal*, 2007. 15(2): p. 105–120.
132. Gavana G., Gottardo P., and Moisello A.M., Earnings management and CSR disclosure. Family vs. non-family firms. *Sustainability*, 2017. 9(12): p. 2327.
133. Crifo P., et al., What drives firms' corporate social responsibility? The role of ownership concentration, in *Corporate Responsibility*. 2016, Springer. p. 183–204.
134. Chen Y., et al., Sustainability with high-speed rails: The effects of transportation infrastructure development on firms' CSR performance. *Journal of Contemporary Accounting Economics*, 2021. 17(2): p. 100261.
135. Bajic S. and Yurtoglu B., Which aspects of CSR predict firm market value? *Journal of Capital Markets Studies*, 2018.

136. Kim J., Cho K., and Park C.K., Does CSR assurance affect the relationship between CSR performance and financial performance? *Sustainability*, 2019. 11(20): p. 5682.
137. Anqi C., et al., The Impact of Green R&D Investment on Corporate Performance and ESG Evaluation. 2023.
138. Wei J., Peng X.-r., and Zhang Y. CSR strategy, green innovation, and firm performance: A conceptual framework. in 2012 International Symposium on Management of Technology (ISMOT). 2012. IEEE.
139. Li Q., et al., Firm performance, corporate ownership, and corporate social responsibility disclosure in China. *Business Ethics: A European Review*, 2013. 22(2): p. 159–173.
